# Supplementary material
Source: PubMed Central journal article supplement (PMC3145268)
Supplement: mmc1.pdf [file mmc1.pdf]

## Supporting material

# Multiple-timescale Dynamics Underlying Spontaneous Oscillations of Saccular Hair Bundles

Yuttana Roongthumskul, Lea Fredrickson-Hemsing, Albert Kao, and Dolores Bozovic

FIGURE S1: Mechanical model of a hair bundle

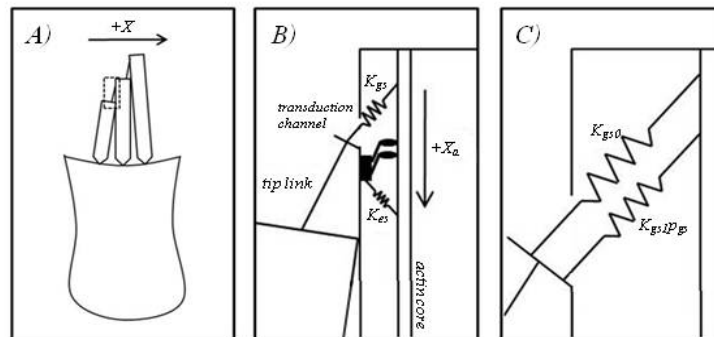

Fig. S1A shows a hair cell with a few of the 30-50 stereocilia that typically comprise a bundle. Horizontal displacement of the bundle is denoted by  $X$ , with positive direction chosen to be towards the tallest stereocilia. The transduction complex (*dashed box* in Fig S1A) is depicted in Fig S1B. Displacement of the myosin motors, denoted by  $X_a$ , is taken to be positive in the downward direction. While the transduction channels have been shown to be located at the lower end of the tip link in mammalian hair bundles (1), this location is not known in the amphibian counterpart. We arbitrarily depict the channel to be at the top end in the diagram but note that placing the channel at the lower end of the tip link would not significantly alter the model. The myosin motors are anchored to the insertional plaque near the transduction channel (*black rectangle* in the diagram). The variable gating spring with stiffness  $K_{gs}$  is illustrated in Fig S1C. The gating spring consists of two elastic elements in parallel, one of which has a calcium-dependent stiffness ( $K_{gsIP_{gs}}$ ), while the stiffness of the other element is constant ( $K_{gs0}$ ). The total stiffness of the combined springs ( $K_{gs}$ ) is always positive.

## Reference

1. Beurg M., R. Fettiplace, J.-H. Nam, and A. J. Ricci, 2009. Localization of inner hair cell mechanotransducer channels using high-speed calcium imaging. *Nat. Neurosci.* 12:553-558.

**Table S1**

| Parameter              | Definition                                                    | Fig 1B, 3B,<br>4-6, 8B, 9B | Fig 1C                | Fig 2                  | Fig 3A                 | Fig 7B                |
|------------------------|---------------------------------------------------------------|----------------------------|-----------------------|------------------------|------------------------|-----------------------|
| $r_m$ (nm)             | Distance from the transduction channel to adaptation motor    | 20                         | 100                   | 20                     | 20                     | 20                    |
| N                      | Number of transduction channels                               |                            |                       | 45                     |                        |                       |
| $\gamma$               | Geometrical gain of stereociliary shear motion                |                            |                       | 0.14                   |                        |                       |
| d (nm)                 | Distance of gating spring relaxation on channel opening       |                            |                       | 7                      |                        |                       |
| $p_{o,0}$              | Resting open probability of transduction channels             |                            |                       | 0.5                    |                        |                       |
| $k_{m,on}$ (1/sM)      | The rate of calcium binding to the adaptation motor           | $30 \times 10^6$           | $10 \times 10^6$      | $30 \times 10^6$       | $10 \times 10^6$       | $10 \times 10^6$      |
| $k_{m,off}$ (1/s)      | The rate of calcium unbinding from the adaptation motor       | $15 \times 10^3$           | $5 \times 10^3$       | $15 \times 10^3$       | $5 \times 10^3$        | $5 \times 10^3$       |
| $S_{max}$ (m/sN)       | The maximal rate constant for slipping adaptation             | $640 \times 10^3$          | $800 \times 10^3$     | $800 \times 10^3$      | $550 \times 10^3$      | $400 \times 10^3$     |
| $S_{min}$ (m/sN)       | The minimal rate constant for slipping adaptation             |                            |                       | 0                      |                        |                       |
| $C_{max}$ (m/s)        | The maximal rate constant for climbing adaptation             | $0.058 \times 10^{-6}$     | $0.04 \times 10^{-6}$ | $0.058 \times 10^{-6}$ | $0.055 \times 10^{-6}$ | $0.02 \times 10^{-6}$ |
| $C_{min}$ (m/s)        | The minimal rate constant for climbing adaptation             |                            |                       | 0                      |                        |                       |
| $X_{sp}$ (nm)          | Resting deflection of stereociliary pivots                    | 236                        | 200                   | 236                    | 190                    | 200                   |
| $X_{es}$ (nm)          | Resting deflection of extension spring                        | 0                          | 40                    | 0                      | 20                     | 0                     |
| $X_c$ (nm)             | Resting extension of gating spring with channel closed        | 17                         | 16                    | 17                     | 15                     | 14                    |
| $K_{es}$ ( $\mu$ N/m)  | Stiffness of extent spring                                    |                            |                       | 140                    |                        |                       |
| $K_{sp}$ ( $\mu$ N/m)  | Stiffness of stereociliary pivots                             | 310                        | 550                   | 310                    | 330                    | 300                   |
| $K_{gs0}$ ( $\mu$ N/m) | Stiffness of gating spring in the absence of calcium          | 2550                       | 3000                  | 2550                   | 2200                   | 2650                  |
| $K_{gs1}$ ( $\mu$ N/m) | The slope of stiffness change with bound calcium              | 2000                       | 2800                  | 2000                   | 1600                   | 2100                  |
| $K_{gs,on}$ (1/sM)     | The rate of calcium binding to the variable gating spring     | $30 \times 10^6$           | $60 \times 10^6$      | $30 \times 10^6$       | $30 \times 10^6$       | $5 \times 10^6$       |
| $K_{gs,off}$ (1/s)     | The rate of calcium unbinding from the variable gating spring | 30                         | 50                    | 30                     | 33                     | 3.3                   |

**Table S1** Parameter values in simulations
